# Supplementary material for: Efficacy of Universal Genome Sequencing in Infant Extracorporeal Membrane Oxygenation
Source: Research Square preprint supplement (doi:10.21203/rs.3.rs-8535209/v1), 2026-01-19
Supplement: Supplementary file 1 [file 6397c1aa8751eecfe11f5e46.docx]

**Supplementary Table 2.** Individual patient clinical characteristics including clinical history, family history, and medication exposures

|  | Age Group | Indication | Type of ECLS | Genetic Testing | Genetic Consult |  |
| --- | --- | --- | --- | --- | --- | --- |
| 1 | Neonatal | Meconium aspiration syndrome | VV | NMS only | No |  |
| Terminfant admitted for **meconium aspiration syndrome** requiring **veno-venous** ECMO, persistent pulmonary hypertension of the newborn, hypotension with initial biventricular dysfunction, adrenal insufficiency, ischemic arterial cerebrovascular injury, seizures, acute renal insufficiency, feeding difficulties requiring home gavage feedings.    Family Hx: Paternal 2nd cousin with childhood epilepsy, no other information provided    Medication Hx: dexamethasone, hydrocortisone, inhaled nitric oxide, epinephrine, norepinephrine, milrinone, prostaglandin E-1, dopamine, phenobarbital, ampicillin, cefepime, furosemide, Ativan, Tylenol, morphine, clonidine, TPN exposure. | | | | | | |
| 2 | Neonatal | Meconium aspiration syndrome | VA | NMS only | No |  |
| Term infant born admitted for **meconium aspiration syndrome**, air leak syndrome (bilateral pneumothoraxes) requiring **veno-arterial** ECMO, persistent pulmonary hypertension of the newborn, hypoxic ischemic encephalopathy, seizures, hypotension, hyponatremia, adrenal insufficiency, acute renal insufficiency, feeding difficulties requiring home gavage feedings.    Family Hx: Not documented    Medication Hx: dexamethasone, hydrocortisone, inhaled nitric oxide, dopamine, dobutamine, epinephrine, milrinone, prostaglandin E-1, phenobarbital, fosphenytoin, Keppra, midazolam, fentanyl, vecuronium, Ativan, morphine, furosemide, TPN exposure | | | | | | |
| 3 | Neonatal | Hypoxic ischemic encephalopathy | VA | WGS | Yes |  |
| Term infant with **hypoxic ischemic encephalopathy**, transferred for hypoxic respiratory failure, PPHN requiring **veno arterial** ECMO. Hospital course complicated by: hypoxic respiratory failure, pulmonary hypertension, metabolic acidosis, hypotension, biventricular dysfunction, hypoxic ischemic encephalopathy s/p therapeutic hypothermia, acute kidney injury, hyperglycemia, anemia, thrombocytopenia, coagulopathy, pulmonary hemorrhage, seizures, adrenal insufficiency, at risk for neurodevelopmental delays.    Family Hx:  A three-generation pedigree was obtained. Paternal family history is significant for Parkinson's disease, pulmonary embolism and strokes over the age of 50 in grandfather. The remainder of the family history was unremarkable for individuals with intellectual disability, birth defects, or known genetic disease. Consanguinity was denied.    Medication Hx: surfactant, inhaled nitric oxide, phenobarbital, milrinone, atropine, Ativan, vecuronium, epinephrine, cefepime, hydrocortisone, acyclovir, dexmedetomidine, fentanyl, morphine, norepinephrine, alprostadil, bumetanide, insulin, vasopressin, furosemide, calcium gluconate, bivalirudin, TPN, heparin. | | | | | | |
| 4 | Neonatal | Meconium aspiration syndrome | VA | NMS only | No |  |
| Term infant with **meconium aspiration syndrome** admitted for hypoxic respiratory failure, pulmonary hemorrhage, PPHN requiring **veno arterial** ECMO. Hospital course complicated by: hypoxic respiratory failure, pulmonary hypertension, pulmonary hemorrhage, hypotension, suspected sepsis, left parietotemporal MCA stroke, seizures, feeding difficulties, at risk for neurodevelopmental delays.    Family Hx: Not documented    Medication Hx: morphine, midazolam, methadone, fentanyl, furosemide, epinephrine, hydrocortisone, ampicillin, gentamicin, acyclovir, meropenem, phenobarbital, TPN, heparin, bivalirudin, antithrombin III, | | | | | | |
| 5 | Neonatal | Meconium aspiration syndrome | VV | WES | Yes |  |
| Term infant **meconium aspiration syndrome**, persistent pulmonary hypertension of the newborn requiring **veno-venous** ECMO, intraventricular hemorrhage, hypotension, neonatal sepsis, thrombocytopenia.    Family Hx: pedigree completed, hx of HTN and myocardial infarctions; no additional relevant history identified    Medication Hx: dexamethasone, dexmedetomidine, epinephrine, vancomycin, piperacillin-tazobactam, furosemide, midazolam, morphine, fentanyl, levetiracetam, pantoprazole, heparin, TPN | | | | | | |
| 6 | Neonatal | Hypoxic ischemic encephalopathy | VV | NMS only | No |  |
| Term infant with **hypoxic ischemic encephalopathy**, transferred for hypoxic respiratory failure, PPHN requiring **veno venous** ECMO. Maternal serologies unremarkable. Hospital course complicated by: hypoxic respiratory failure, pulmonary hypertension, hypotension, hypoxic ischemic encephalopathy s/p therapeutic hypothermia, acute kidney injury requiring CRRT, fat necrosis, seizures, opioid dependence, anemia, feeding difficulties, at risk for neurodevelopmental delays.    Family Hx: Not documented    Medication Hx: inhaled nitric oxide, hydrocortisone, morphine, dexmedetomidine, phenobarbital, clonidine, vecuronium, epinephrine, vasopressin, furosemide, ampicillin, ceftazidime, acyclovir, calcium gluconate, sodium bicarbonate, TPN, heparin. | | | | | | |
| 7 | Neonatal | Hypoxic ischemic encephalopathy | VV | Other (Neonatal crisis panel | No |  |
| Term infant with **hypoxic ischemic encephalopathy**, transferred for hypoxic respiratory failure, pneumothorax, PPHN, hypotension requiring **veno venous** ECMO. Hospital course complicated by: hypoxic respiratory failure, meconium aspiration syndrome, pulmonary hypertension, pneumothorax s/p chest tube placement, hypotension, hypoxic ischemic encephalopathy s/p therapeutic hypothermia, suspected sepsis, coagulopathy, adrenal insufficiency, seizures, cardiac dysfunction, L MCA neonatal stroke, vocal cord paralysis, pharyngeal dysfunction s/p cricoid split, opioid dependence, anemia, feeding difficulties, at risk for neurodevelopmental delays.    Family Hx: Not documented    Medication Hx: inhaled nitric oxide, epinephrine, milrinone, hydrocortisone, insulin, vasopressin, dopamine, morphine, dexmedetomidine, phenobarbital, fosphenytoin, methadone, clonidine, vecuronium, fentanyl, furosemide, chlorothiazide, ampicillin, gentamicin, vancomycin, calcium gluconate, sodium bicarbonate, dexamethasone, ciprodex, Atrovent, TPN, heparin. | | | | | | |
| 8 | Neonatal | Hypoxic ischemic encephalopathy | VV to VA | NMS only | No |  |
| Term infant with **hypoxic ischemic encephalopathy**, transferred for hypoxic respiratory failure, PPHN requiring **veno venous w/ conversion to VV-A** ECMO. Hospital course complicated by: meconium aspiration syndrome, hypoxic respiratory failure, pulmonary hypertension, hypotension, hypoxic ischemic encephalopathy s/p therapeutic hypothermia, acute kidney injury, vocal cord paresis, GBS sepsis, opioid dependence, anemia, feeding difficulties s/p GT placement, at risk for neurodevelopmental delays.    Family Hx: Not documented    Medication Hx: surfactant, inhaled nitric oxide, epinephrine, norepinephrine, hydrocortisone, milrinone, vasopressin, morphine, dexmedetomidine, clonidine, vecuronium, furosemide, ampicillin, cefepime, calcium gluconate, Atrovent, albuterol, TPN, heparin. | | | | | | |
| 9 | Neonatal | Congenital diaphragmatic hernia | VA | NMS only | No |  |
| Patient is a term male infant with **congenital diaphragmatic hernia** admitted for hypoxic respiratory failure, PPHN, hypoxic ischemic encephalopathy s/p whole body cooling, requiring **veno arterial** ECMO. Hospital course complicated by: respiratory failure, moderate hypoxic ischemic encephalopathy, pulmonary hypertension, clinical sepsis, hypotension, pneumothorax, subgaleal hemorrhage, jugular thrombus, feeding difficulties, at risk for neurodevelopmental delays.    Family Hx: Not documented    Medication Hx: ampicillin, cefepime, hydrocortisone, midazolam, morphine, furosemide, dopamine, epinephrine, dexmedetomidine, TPN, heparin | | | | | | |
| 10 | Neonatal | Disseminated Enterovirus (other) | VA | NMS only | No |  |
| Term infant with **disseminated enterovirus** infection admitted for myocarditis, meningitis, and hepatitis, requiring **veno arterial** ECMO. Maternal serologies unremarkable. Hospital course complicated by: Acute respiratory failure, seizures, acute kidney injury requiring peritoneal drain, anasarca, left arterial ischemic stroke, myocarditis, tachyarrhythmia (junctional), cardiac failure, adrenal insufficiency, hepatitis, thrombocytopenia, necrotizing enterocolitis (medical), R vocal cord paralysis, feeding difficulties, at risk for neurodevelopmental delays.    Family Hx: Denies    Medication Hx: ampicillin, cefepime, acyclovir, acetaminophen, dopamine, methadone, famotidine, oxcarbazepine, phenobarbital, aminophylline, amiodarone, bumetanide, carvedilol, chlorothiazide, clonidine, digoxin, fosphenytoin, furosemide, hydrocortisone, levetiracetam, levothyroxine, midazolam, spironolactone, milrinone, zosyn, vancomycin, TPN, heparin | | | | | | |
| 11 | Neonatal | Hyperammonemia and metabolic acidosis | VA | Microarray, WES | Yes |  |
| Term infant with cardiorespiratory failure of unknown origin admitted for **multiorgan dysfunction, hyperammonemia and metabolic acidosis** requiring **veno arterial** ECMO. Maternal serologies unremarkable. Hospital course complicated by: Acute respiratory failure, biventricular congestive heart failure, pulmonary hypertension, acute liver failure, acute tubular necrosis, anasarca, intraparenchymal hemorrhage, coagulopathy, hypertrophic cardiomyopathy, intestinal perforation s/o ileostomy and bowel resection, increased ferritin, hyperammonemia, metabolic acidosis, clinical sepsis, at risk for neurodevelopmental delays.    Family Hx: Cystic Fibrosis, BRCA1-related HBOC    Medication Hx:  ampicillin, acyclovir, fentanyl, midazolam, morphine, cefepime, dexmedetomidine, hydralazine, hydrocortisone, chlorothiazide, inhaled nitric oxide, prostaglandin E1, vasopressin, epinephrine, furosemide, famotidine, flagyl, TPN, heparin | | | | | | |
| 12 | Neonatal | Congenital diaphragmatic hernia | VA | NMS only | No |  |
| Term infant admitted for postnatally diagnosed right **congenital diaphragmatic hernia**, hypoxic respiratory failure, persistent pulmonary hypertension of the newborn requiring **veno arterial** ECMO. Hospital course complicated by: Right CDH (type C) s/p patch repair, pulmonary arterial hypertension, pneumothorax, hypotension, hypertension, anemia, chronic lung disease, iatrogenic opioid withdrawal, oral aversion, gastrostomy placement, at risk for neurodevelopmental delays.    Family Hx: Unremarkable, denies history of blood clots, history of miscarriage, or known history of seizures.    Medication Hx: ampicillin, gentamicin, fentanyl, Ativan, morphine, dexmedetomidine, methadone, iron, sildenafil, famotidine, TPN, heparin | | | | | | |
| 13 | Neonatal | PPHN | VA | Prenatal testing; Karyotype | Yes |  |
| 06-002  Term infant male with **Trisomy 21** admitted for severe persistent pulmonary hypertension of the newborn (**PPHN**), hypoxic respiratory failure, requiring **veno arterial** ECMO. Maternal serologies unremarkable. Hospital course complicated by: Persistent pulmonary hypertension of newborn, Trisomy 21, pulmonary hemorrhage, hypotension, anemia, hearing loss (bilateral), feeding difficulties, at risk for neurodevelopmental delays.    Family Hx: Unremarkable.    Medication Hx: inhaled nitric oxide, ampicillin, gentamicin, rocuronium, dopamine, norepinephrine, poractant alfa, morphine, sildenafil, famotidine, TPN, heparin | | | | | | |
| 14 | Infant | Congenital heart disease | VA (central) | Microarray | Genetics |  |
| Patient is an **infant** male with **hypoplastic left heart syndrome** (HLHS) s/p DHCA requiring Norwood with 5mm Sano s/p cardiac arrest requiring **chest exploration and VA ECMO**, cardiac massage due to tamponade. Hospital course complicated by: HLHS s/p Norwood interstage, pericardial effusion, cardiac tamponade, SVT, hypotension, adrenal insufficiency, anemia, feeding problem in infant, iatrogenic opioid withdrawal, at risk for neurodevelopmental delays.    Family Hx: Unremarkable.    Medication Hx: prostaglandin E1, amiodarone, milrinone, epinephrine, calcium chloride, vasopressin, digoxin, inhaled nitric oxide, diuril, bumex, Lasix, iron, ancef, vancomycin, cefepime, hydrocortisone, morphine, Tylenol, precedex, methadone, dilaudid, clonidine, aspirin, multivitamin | | | | | | |
| 15 | Neonatal | Meconium aspiration syndrome | VA | NMS only | No |  |
| Term infant with **meconium aspiration syndrome** admitted for hypoxic respiratory failure, persistent pulmonary hypertension of the newborn (PPHN), hypoxic respiratory failure, requiring **veno arterial** ECMO. Hospital course complicated by: Persistent pulmonary hypertension of newborn, hypotension, culture negative sepsis, encephalomalacia, anemia, hyperbilirubinemia, feeding difficulties, at risk for neurodevelopmental delays, hypertension.  Family Hx: PCOS, Anxiety, Depression    Medication Hx: ampicillin, gentamicin, inhaled nitric oxide, dopamine, surfactant, morphine, dexmedetomidine, epinephrine, hydrocortisone, midazolam, rocuronium, dexamethasone, TPN, heparin | | | | | | |
| 16 | Neonatal | Respiratory failure | VA | Karyotype | No |  |
| Late preterm infant with air leak syndrome and pelvic cystic mass admitted for hypoxic **respiratory failure**, bilateral pneumothoraxes, pneumomediastinum, hydronephrosis, bladder outlet obstruction, anorectal malformation, requiring **veno arterial** ECMO. Maternal serologies unremarkable.  Hospital course complicated by: air leak syndrome, GBS pneumonia, pulmonary hypertension, acute kidney injury requiring continuous renal replacement therapy (CRRT), portal vein thrombosis, hepatic hemangioma, hematuria, nephrocalcinosis, anemia, thrombocytopenia, direct hyperbilirubinemia, feeding difficulties, at risk for neurodevelopmental delays, hypertension.    Family Hx: Not documented    Medication Hx: ampicillin, cefepime, fluconazole, vancomycin, bivalirudin, calcium chloride, morphine, dexmedetomidine, methadone, surfactant, metronidazole, epinephrine, hydrocortisone, sildenafil,  TPN, heparin | | | | | | |
| 17 | Neonatal | Congenital diaphragmatic hernia | VA | Microarray | Yes |  |
| Term infant with **congenital diaphragmatic hernia** admitted for hypoxic respiratory failure, PPHN, moderate hypoxic ischemic encephalopathy s/p whole body cooling, hypotension, requiring **veno arterial** ECMO and CRRT. Maternal serologies unremarkable. Hospital course complicated by: cleft palate, pulmonary hypertension, prothrombotic state, hydronephrosis, anemia, chylothorax, acquired hypogammaglobulinemia, metabolic acidosis, at risk for neurodevelopmental delays.    Family Hx: Marfan syndrome (maternal brother)    Medication Hx: ampicillin, bumetanide, chlorothiazide, furosemide, enoxaparin, morphine, ativan, fentanyl, dexmedetomidine, norepinephrine, dopamine, epinephrine, inhaled nitric oxide, milrinone, sildenafil, nitroglycerin, hydrocortisone, phenobarbital, Keppra, lorazepam, TPN, heparin | | | | | | |
| 18 | Neonatal | Congenital heart disease | VA | Microarray, Other (PGx panel) | No |  |
| Term infant male with **hypoplastic left heart syndrome** (HLHS) admitted for management of single ventricle congenital heart disease with progression of pulmonary hypertension requiring **veno arterial ECMO**. Hospital course complicated by: congenital heart disease (HLHS) s/p Norwood w/ Sano palliation, Blalock-Taussig shunt s/p removal, bidirectional Glenn; respiratory failure, chronic subdural hematoma, seizures, necrotizing enterocolitis (medical), innominate vein thrombosis, anasarca, low cardiac output syndrome, feeding intolerance.    Family Hx: Not documented    Medication Hx: poractant, ampicillin, gentamicin, prostaglandin E1, aspirin, calcium carbonate, chlorothiazide, clonidine, furosemide, gabapentin, levetiracetam, lorazepam, melatonin, methadone, omeprazole, pyridoxine, quetiapine, rivaroxaban, sildenafil, milrinone, amlodipine, TPN, heparin | | | | | | |
| 19 | Infant | Respiratory failure | VV | Microarray, WES | Yes |  |
| Ten-month-old infant admitted to acute hypoxic **respiratory failure** in the setting of RSV bronchiolitis requiring **veno-venous** ECMO.  Past history notable for dextrocardia, R lung agenesis, pulmonary hypertension, and intermittent stridor since birth. Recent ED visit for stridor s/p treatment with racemic epinephrine and dexamethasone. Developmentally appropriate for chronologic age. Hospital course complicated by: Acute respiratory failure, RSV bronchiolitis, bronchospasm, hypotension, dextrocardia, Pulmonary Hypertension, R lung agenesis, L bronchus compression s/p aortoplexy.    Family Hx: Sibling with hydrocephalus requiring shunt    Medication Hx: Albuterol, aminophylline, terbutaline, magnesium sulfate, dexamethasone, vasopressin, famotidine, furosemide, bumex, vancomycin, ceftriaxone, micafungin, unasyn, cefepime, Bactrim, fentanyl, morphine, dilaudid, versed, precedex, ketamine, propofol, nimbex, rocuronium, Seroquel, methadone, valium, clonidine | | | | | | |
| 20 | Neonatal | Congenital diaphragmatic hernia | VA | Prenatal testing, microarray | No |  |
| Term infant admitted for left **congenital diaphragmatic hernia** requiring **veno-arterial** ECMO. Prenatally followed for L CDH – stomach in chest, liver in chest, dextrocardia, s/p Goretex patch repair. Hospital course complicated by:   PPHN, metabolic acidosis, biventricular dysfunction, hyperglycemia, sepsis (clinical), bacterial tracheitis (stenotrophomonas), acute renal injury w/ need for CRRT, adrenal insufficiency, anemia, coagulopathy, hypophosphatemia.    Family Hx: Maternal hx of thyroglossal duct cyst, asthma, anxiety disorder    Medication Hx: iNO, inhaled prostacyclin, vitamin K, heparin, ampicillin, ceftazidime, vancomycin, fluconazole, vasopressin, epinephrine, dobutamine, milrinone, sildenafil, hydralazine, bosentan, Treprostinil, hydrocortisone, morphine, midazolam, dexmedetomidine, vecuronium, furosemide, bumetanide, TPN | | | | | | |
| 21 | Neonatal | Meconium aspiration syndrome | VV | NMS only | No |  |
| Term infant admitted for acute hypoxic respiratory failure due to **meconium aspiration syndrome**, pulmonary hemorrhage, and persistent pulmonary hypertension of the newborn requiring **veno-venous** ECMO. Hospital course complicated by: Pulmonary hemorrhage, sepsis, meconium aspiration syndrome, thrombocytopenia, hypokalemia, hypocalcemia, anuria, acute ischemic stroke (bilateral hemisphere), anemia, hypotension, and iatrogenic opioid withdrawal, at risk for neurodevelopmental delays.    Family Hx: Unremarkable, denies history of blood clots, history of miscarriage, or known history of seizures.    Medication Hx: surfactant, dopamine, inhaled nitric oxide, vasopressin, milrinone, hydrocortisone, morphine, midazolam, vecuronium, acyclovir, ampicillin, amikacin, levetiracetam (Keppra), sildenafil, hydralazine, furosemide, polyethylene glycol, ceftazidime, TPN, heparin | | | | | | |
| 22 | Neonatal | Congenital diaphragmatic hernia | VA | Microarray | No |  |
| Term infant female with left **congenital diaphragmatic hernia** and **complete AV canal** admitted for fetal growth restriction, hypoxic respiratory failure, PPHN, requiring **veno arterial** ECMO and CAVC repair (s/p CAVC repair with single patch closure of AVC with 3mm fenestration, MPA patch, mitral & pulmonary valvotomy). Hospital course complicated by: metabolic acidosis, atrial flutter, atrial tachycardia s/p cardioversion, genetic condition, feeding issues, GERD, deep venous thrombosis, at risk for neurodevelopmental delays.    Family Hx: Father with prior child with CDH    Medication Hx: morphine, amiodarone, dexmedetomidine, hydromorphone, milrinone, procainamide, sotalol, aspirin, bumetanide, calcium carbonate, ceftazidime, chlorothiazide, dexamethasone, diazepam, hydrocortisone, methadone, spironolactone, tadalafil, tobramycin, vancomycin, TPN, heparin | | | | | | |
| 23 | Neonatal | Congenital diaphragmatic hernia | VA | Microarray | No |  |
| Term infant with **congenital diaphragmatic hernia** transferred for hypoxic respiratory failure requiring **veno arterial** ECMO. Hospital course complicated by: hypoxic respiratory failure, pulmonary hypertension, left diaphragmatic hernia s/p repair, metabolic acidosis, hypotension, biventricular dysfunction, hypoxic ischemic encephalopathy, Staph epi sepsis, anemia, thrombocytopenia, coagulopathy, hyperglycemia, seizures, adrenal insufficiency, atrial fibrillation requiring cardioversion, at risk for neurodevelopmental delays.    Family Hx: Not documented    Medication Hx: ampicillin, morphine, dobutamine, epinephrine, hydrocortisone, ceftazidime, phenobarbital, vecuronium, amicar, vancomycin, iNO, adenosine, milrinone, sildenafil, dexmedetomidine, epoprostenol, Keppra, CRRT, bivalirudin, TPN, heparin. | | | | | | |
| 24 | Neonatal | PPHN | VA | Prenatal testing, Microarray, karyotype | Yes |  |
| Term infant with **Trisomy 21**, hypoxic respiratory failure, and **PPHN** requiring **veno arterial** ECMO. Maternal serologies undocumented, GBS positive. Pregnancy complications not documented, prenatal testing c/w Trisomy 21 on cell-free DNA testing. Hospital course complicated by: hypoxic respiratory failure, pulmonary hypertension, congenital heart disease, Trisomy 21, hypertrophic cardiomyopathy, ventricular septal defect, hydronephrosis, congenital hypothyroidism, adrenal insufficiency, feeding difficulties, at risk for neurodevelopmental delays.    Family Hx: Not documented    Medication Hx: iNO, dopamine, epinephrine, vecuronium, fentanyl, furosemide, Aldactone, tadalafil, levothyroxine, amikacin, ampicillin, hydrocortisone, midazolam, milrinone, vasopressin, bivalirudin, TPN, heparin. | | | | | | |
| 25 | Neonatal | Congenital diaphragmatic hernia | VA | Microarray, karyotype | No |  |
| Term infant male with **congenital diaphragmatic hernia** transferred for hypoxic respiratory failure, and PPHN requiring **veno arterial** ECMO. Hospital course complicated by: hypoxic respiratory failure, pulmonary hypertension, congenital diaphragmatic hernia, hypoxic ischemic encephalopathy s/p therapeutic hypothermia, biventricular dysfunction, hypotension, coagulopathy, acute kidney injury, at risk for neurodevelopmental delays.    Family Hx: Not documented    Medication Hx: dexmedetomidine, epinephrine, midazolam, morphine, amicar, ampicillin, cefazolin, vancomycin, ceftazidime, vasopressin, milrinone, dobutamine, vecuronium, famotidine, pantoprazole, furosemide, nystatin, CRRT, bivalirudin, TPN, heparin. | | | | | | |
