# Supplementary material for: Efficacy of Universal Genome Sequencing in Infant Extracorporeal Membrane Oxygenation
Source: Research Square preprint supplement (doi:10.21203/rs.3.rs-8535209/v1), 2026-01-19
Supplement: Supplementary file 2 [file 6994ce4f572a9f497f4910c8.docx]

**Supplementary Table 1.** Summary of individual genomic sequencing results and secondary findings

| **Sample ID** | **Sample tested** | **Results** | **Medical Indication/HPO terms** | **WGS Results** | **Disease** | **Secondary Finding** |
| --- | --- | --- | --- | --- | --- | --- |
| 1 | Trio | **Positive** | Meconium aspiration syndrome, stroke, sepsis | Compound heterozygous missense variants in *ZNFX1*: c.2855A>G, p.Tyr952Cys Maternalyl inherited , c.1653G>C, p.Met551Ile Paternally inherited | Immunodeficiency 91 and hyperinflammation (MIM: 619644) – AR* | *KCNH2*, c.1979C>T, p.Ser660Leu, maternal inherited, likely pathogenic variant for dominant Long QT syndrome |
| 2 | Duo | Non-diagnostic | Meconium aspiration syndrome, Respiratory failure, Pneumothorax, Adrenal insufficiency, Hyponatremia, Hypotension, Patent Ductus Arteriosus, Pulmonary hypertension, Sepsis in newborn, Hypoxic Ischemic Encephalopathy, Seizures, Acute renal insufficiency |  |  |  |
| 3 | Trio | Non-diagnostic | Meconium aspiration syndrome, Respiratory failure, Hypocalcemia, Hypotension, Pulmonary hypertension, Sepsis in newborn, Intraventricular hemorrhage |  |  |  |
| 4 | Trio | Uncertain | Congenital diaphragmatic hernia, Respiratory failure, Pulmonary hypertension, Pneumothorax, Hypotension, Anemia | VUS - Compound heterozygous missense variants in *XIRP2*: c.1788G>T, p.Trp596Cys — paternally inherited c.1922A>G, p.His641Arg — maternally inherited | Gene involved in Congenital Diaphragm Hernia (Matsunami et al., PMID: 29570242) |  |
| 5 | Trio | **Positive** | Pulmonary hypertension, hypotension | 47,XY,+21 trisomy 21, de novo |  |  |
| 6 | Duo | Uncertain | Pericardial effusion, Cardiac tamponade, Hypotension, Anemia | Pathogenic Variant - *VWF*: c.7130del, p.Pro2377ArgfsTer27 — maternally inherited | von Willebrand disease, type 1 (MIM#193400)-AD*, von Willebrand disease, type 3 (MIM# 277480)-AR, von Willebrand disease, types 2A, 2B, 2M, and 2N (MIM#613554)-AD/AR. VWF deficiency could play a role in ECMO |  |
| 7 | Trio | Uncertain | Respiratory failure, Bronchiolitis, Bronchospasm, Hypotension, R lung agenesis, Dextrocardia, Pulmonary hypertension, Sepsis (Staph (unknown), Acinetobacter, Serratia), Delirium | VUS - Nonsense variant in *ZNF226*: c.2299C>T, p.Arg767Ter De novo | ZNF226: gene of unknown significance |  |
| 8 | Duo | Non-diagnostic | Left congenital diaphragmatic hernia, Respiratory failure, Pulmonary hypertension, Left ventricular dysfunction, Right ventricular dysfunction, Hypotension, Metabolic acidosis, Hyperglycemia, Hypophosphatemia, Sepsis (clinical), Adrenal Insufficiency, Cerebral atrophy |  |  |  |
| 9 | Duo | **Positive** | Pulmonary hypertension, pulmonary hemorrhage, stroke, renal failure | Single nucleotide duplication in *EPHB4*: c.2022dup; p.Asn675GlnfsTer84, maternally inherited | Capillary malformation-arteriovenous malformation 2  (MIM618196)-AD |  |
| 10 | Trio | Uncertain | Meconium Aspiration Syndrome, Respiratory failure, Pulmonary hypertension, Culture negative sepsis, Hypotension, Anemia, Encephalomalacia, Hypertension | 1. VUS - Missense variant in *MAP3K19*: c.3428A>G, p.Tyr1143Cys — de novo 2. VUS - Missense variant in *SAMD9L*: c.2008G>A, p.Glu670Lys — paternally inherited | 1. Variant of uncertain significance, recent publications suggest relationship to pulmonary fibrosis 2. Ataxia-pancytopenia syndrome (MIM#159550)-AD, Spinocerebellar ataxia 49 (MIM619806)-AD |  |
| 11 | Duo | Non-diagnostic | Air Leak Syndrome, Respiratory failure, Group B Strep pneumonia, Pulmonary hypertension, Pulmonary hypoplasia, Sepsis, Hypotension, Anemia, Thrombocytopenia, Hydroureter, Nephrotic syndrome, Vesicoureteral reflux, Hepatic hemangioma, Hydrometrocolpos |  |  |  |
| 12 | Duo | Non-diagnostic | Congenital diaphragmatic hernia (type D), Respiratory failure, Pulmonary hypertension, Pulmonary hypoplasia, Thrombus, Adrenal insufficiency, Hypotension, Anemia, Metabolic Acidosis, Hydronephrosis, Cleft palate |  |  |  |
| 13 | Trio | **Positive** | Congenital diaphragmatic hernia, complete AV canal | 8p23.1 microdeletion syndrome. Chromosome 8p23.1 3.8Mb deletion including 47 genes, including *GATA4* gene, De novo | *GATA4*-related disorders (MIM:600576); Heart defect in dominant manner, congenital diaphragm hernia. |  |
| 14 | Duo | Uncertain | Meconium aspiration syndrome, Respiratory failure, Pulmonary hypertension, Pulmonary hemorrhage, Hypotension, Anemia, Ischemic stroke, Seizures, Feeding difficulties, Sepsis | Pathogenic - A complex rearrangement involving a duplication-inversion-duplication detected on chromosome 1, chr1:237010461-237256311 DUP 245850bp, chr1:237256311-238685907 INV 1429596bp, chr1:238685907-239136023 DUP 450116bp, not in mother. The first breakpoint and DUP would both duplicate exon 1 of *RYR2* and also invert the rest of the gene, so likely a total loss of function allele | The *RYR2* pathogenic variant can cause ventricular arrhythmias due to cardiac ryanodine receptor calcium release deficiency syndrome (OMIM#115000), AD. Not consistent with the patient’s phenotype, the clinical significance of this finding is considered uncertain |  |
| 15 | Duo | **Positive** | Pulmonary hypertension, HIE,   anemia | A hemizygous missense variant in *G6PD* gene, c.968T>c, p.Leu323Pro, the mother is heterozygous | Anemia, congenital, nonspherocytic hemolytic, 1, G6PD deficient (MIM:300908) -X-linked | *PROX*, c.1303C>T, p.Gln435Ter, not maternally inherited, pathogenic variant. Pathogenic variants in *PROX* can cause autosomal dominant Variegate porphyria. Uncertain clinical significance |
| 16 | Trio | Non-diagnostic | Enterovirus infection, Myocarditis, Meningitis, Hepatitis, Respiratory failure, Junctional Escape, Tachycardiac, Acute Kidney Failure, Arterial Ischemic Stroke, Seizures, Cardiac Failure, Adrenal Insufficiency, Thrombocytopenia, Necrotizing enterocolitis, Hypotension, Vocal cord paralysis, Anemia |  |  |  |
| 17 | Trio | Non-diagnostic | Hypertrophic Cardiomyopathy, Biventricular Cardiac Dysfunction, Respiratory failure, Pulmonary hypertension, Hyperammonemia, Adrenal insufficiency, Hypotension, Anemia, Thrombocytopenia, Metabolic Acidosis, Acute Liver Failure, Acute Tubular Necrosis, Intraparenchymal Hemorrhage, Increased Ferritin, Sepsis |  |  |  |
| 18 | Duo | Uncertain | Hypoxic ischemic encephalopathy, Respiratory failure, Pulmonary hypertension, Hypotension, Anemia, Seizures, Feeding difficulties, Fat Necrosis | 1. Pathogenic - Nonsense variant in *AFG2A*: c.2140C>T, p.Arg714Ter — not present in the father 2. VUS  Homozygous missense variant in *EXOSC9*: c.482G>A, p.Arg161Gln — homozygous in the proband; father is heterozygous | 1. Neurodevelopmental disorder with hearing loss, seizures, and brain abnormalities (MIM#616577)-AR, no second variant 2. Pontocerebellar hypoplasia, type 1D (MIM#618065)-AR Seizure, Feeding difficulties, Respiratory failure, Encephalopathy, Pulmonary hypertensive crisis |  |
| 19 | Trio | Uncertain | Hypoxic ischemic encephalopathy, Respiratory failure, Pulmonary hypertension, Pneumothorax, Hypotension, Sepsis, Coagulopathy, Ischemic stroke, Seizure, Vocal cord paralysis, Anemia, Developmental Delay, Feeding Difficulties, Adrenal Insufficiency, Cardiac Dysfunction | VUS - Compound heterozygous missense variants in *ERCC6*: c.4208A>T, p.Glu1403Val — maternally inherited c.1274A>C, p.Asp425Ala — paternally inherited | Cockayne syndrome, type B (MIM#133540)-AR with Seizures, Encephalopathy, Respiratory failure, Hypotension, Ischemic stroke, Vocal cord paralysis, Globaldevelopmental delay |  |
| 20 | Trio | Uncertain | Hypoxic ischemic encephalopathy, Respiratory failure, Pulmonary hypertension, Hypotension, Vocal cord paresis, Pleural effusion, Sepsis, group B strep, Acute kidney injury, Anemia, Feeding difficulties, Developmental Delay | Pathogenic - Nonsense variant in *PIGB*: c.663C>G, p.Tyr221Ter Paternally inherited | Developmental and epileptic encephalopathy 80 (MIM#618580)-AR, no second variant |  |
| 21 | Trio | Uncertain | Hypoxic ischemic encephalopathy, Respiratory failure, Pulmonary hypertension, Pulmonary hemorrhage, Hypotension, Ventricular dysfunction, Sepsis, Hyperglycemia, Thrombocytopenia, Anemia, Seizures, Adrenal insufficiency, Coagulopathy, Acute kidney injury, Developmental Delay | 1.VUS - Missense variant in *COL6A2*: c.3023C>G, p.Pro1008Arg paternally inherited 2. VUS- Missense variant in *FLNC*: c.3881A>G,p.Asn1294Ser paternally inherited | 1. Ullrich congenital muscular dystrophy 1B (MIM# 620727)-AD/AR 2. Cardiomyopathy, familial hypertrophic, 26 (MIM# 617047)-AD |  |
| 22 | Duo | Uncertain | Hypoplastic left heart syndrome, Respiratory failure, Pulmonary hypertension, Seizure, Subdural, Hematoma, Thrombus, Necrotizing Enterocolitis, Hypotension, Delirium, Feeding difficulties | VUS - Compound heterozygous missense variants in *MADD*: c.2007C>A, p.Ser669Arg maternally inherited; c.2023G>A, p.Glu675Lys NOT in mother | DEEAH syndrome (MIM#619004)-AR, Neurodevelopmental disorder with dysmorphic facies, impaired speech and hypotonia (MIM#619005)-AR |  |
| 23 | Duo | Non-diagnostic | Congenital diaphragmatic hernia (left), Hypoxic ischemic encephalopathy, Respiratory failure, Pulmonary hypertension, Hypotension, Ventricular dysfunction, Sepsis, Thrombocytopenia, Anemia, Seizures, Adrenal insufficiency, Coagulopathy, Atrial fibrillation, Developmental Delay |  |  |  |
| 24 | Trio | **Positive** | VSD, ASD, hypertrophic cardiomyopathy, hypothyroidism | 47,XX,+21 trisomy 21, de novo | Down Syndrome (MIM: 190685) |  |
| 25 | Trio | Uncertain | Congenital Diaphragmatic Hernia, Respiratory failure, Pulmonary hypertension, Biventricular dysfunction, Metabolic acidosis, Hypotension, Hypoxic Ischemic Encephalopathy, Thrombocytopenia, Coagulopathy, Acute Kidney Injury, Developmental Delay | VUS - Missense variant in *COL3A1*: c.923G>A, p.Arg308Gln, maternal inherited | Ehlers-Danlos syndrome, vascular type (MIM#130050)-AD, vascular type, could be CDH gene |  |
|  |  |  |  |  |  |  |

AR*: autosomal recessive

AD*: autosomal dominant
